# Supplementary material
Source: ML conference proceedings conference paper supplement (https://openaccess.thecvf.com/content/cvpr_2017/html/Stone_Teaching_Compositionality_to_2017_CVPR_paper.html)
Supplement: Supplementary file 1 [file Stone_Teaching_Compositionality_to_2017_CVPR_supplemental.pdf]

## Teaching Compositionality to CNNs (supplement material)

Austin Stone  
Yi Liu

Huayan Wang  
D. Scott Phoenix

Michael Stark  
Dileep George

Vicarious FPC, San Francisco, CA, USA

`{austin, huayan, michael, yi, scott, dileep}@vicarious.com`

### Additional visualizations

In Figure 6 of the paper we showed guided-backprop [39] visualization on a number of images that better illustrate the effect of adding our compositionality constraint. To confirm that this observation is consistent over a large portion of images, we sampled 243 images completely at random from MS-COCO validation set and applied that same visualization (see Figure 1-9).

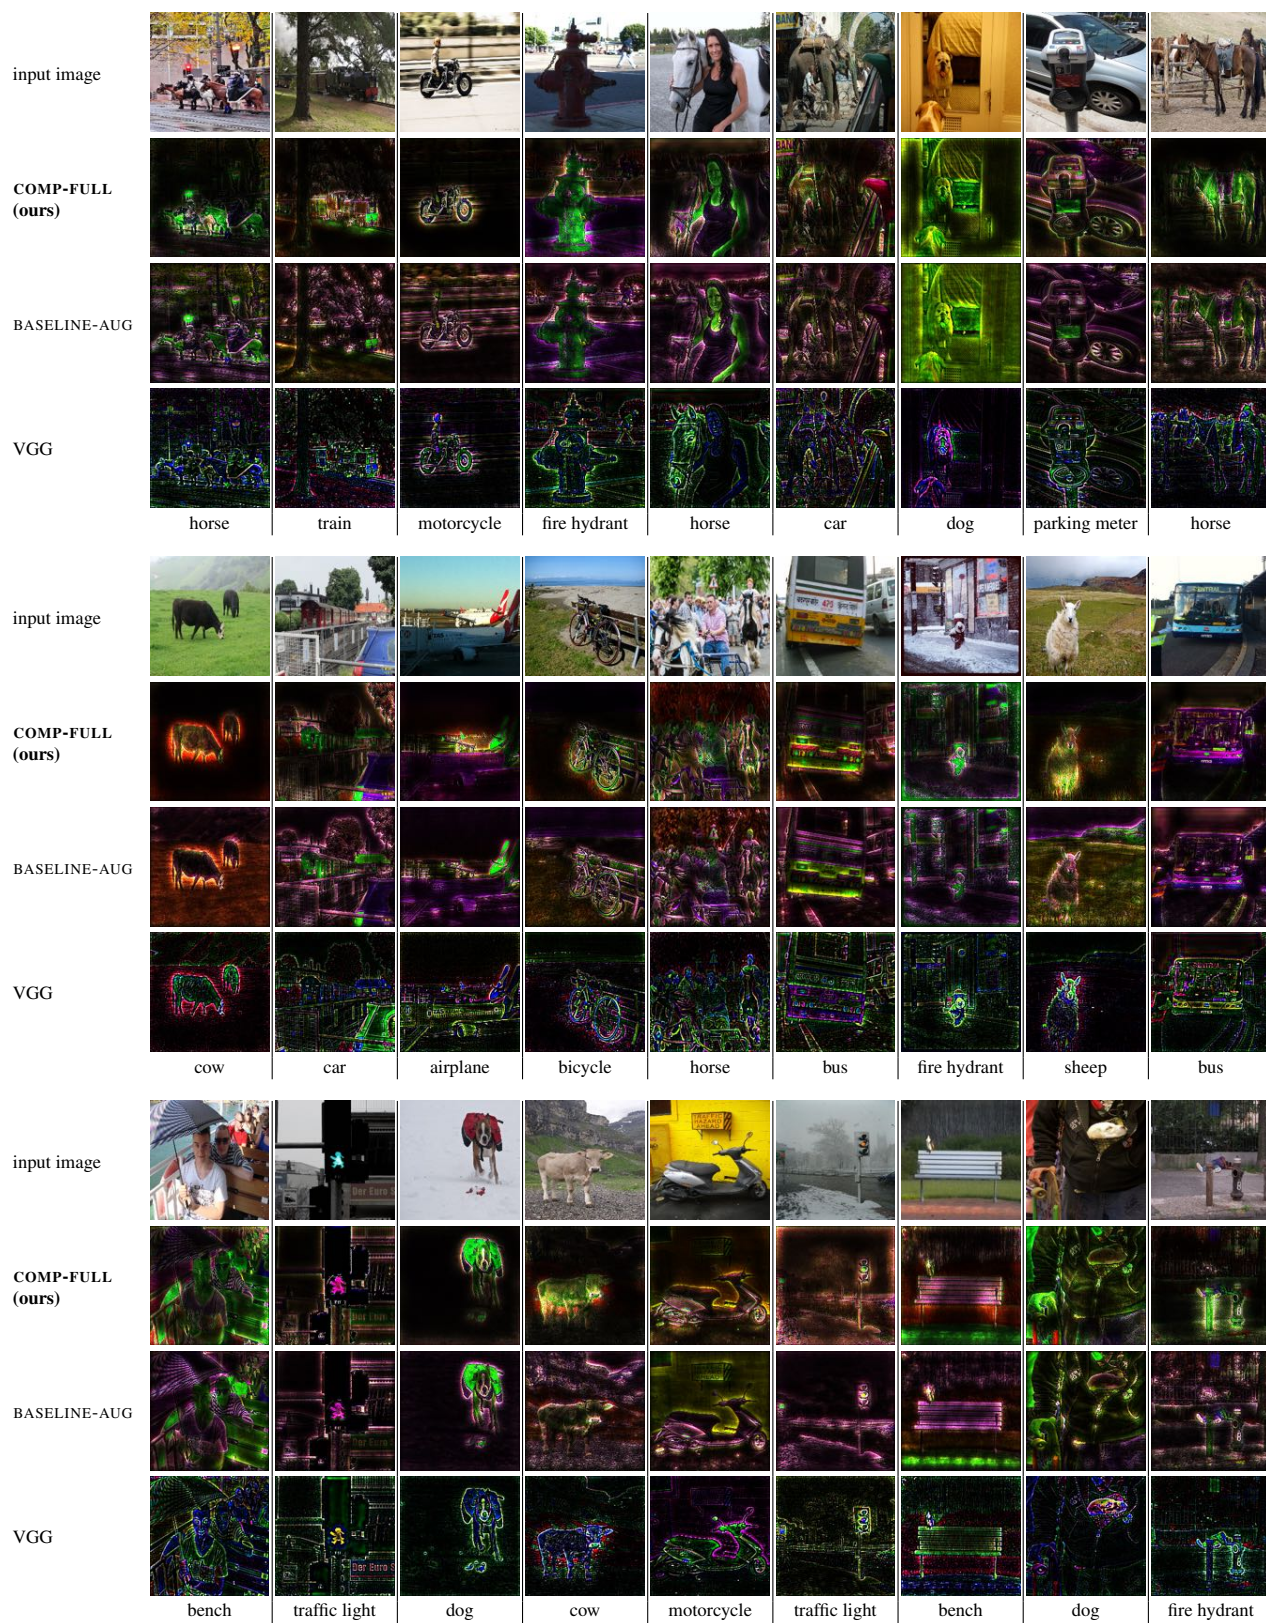

Figure 1: Same as Figure 6 in the main paper.



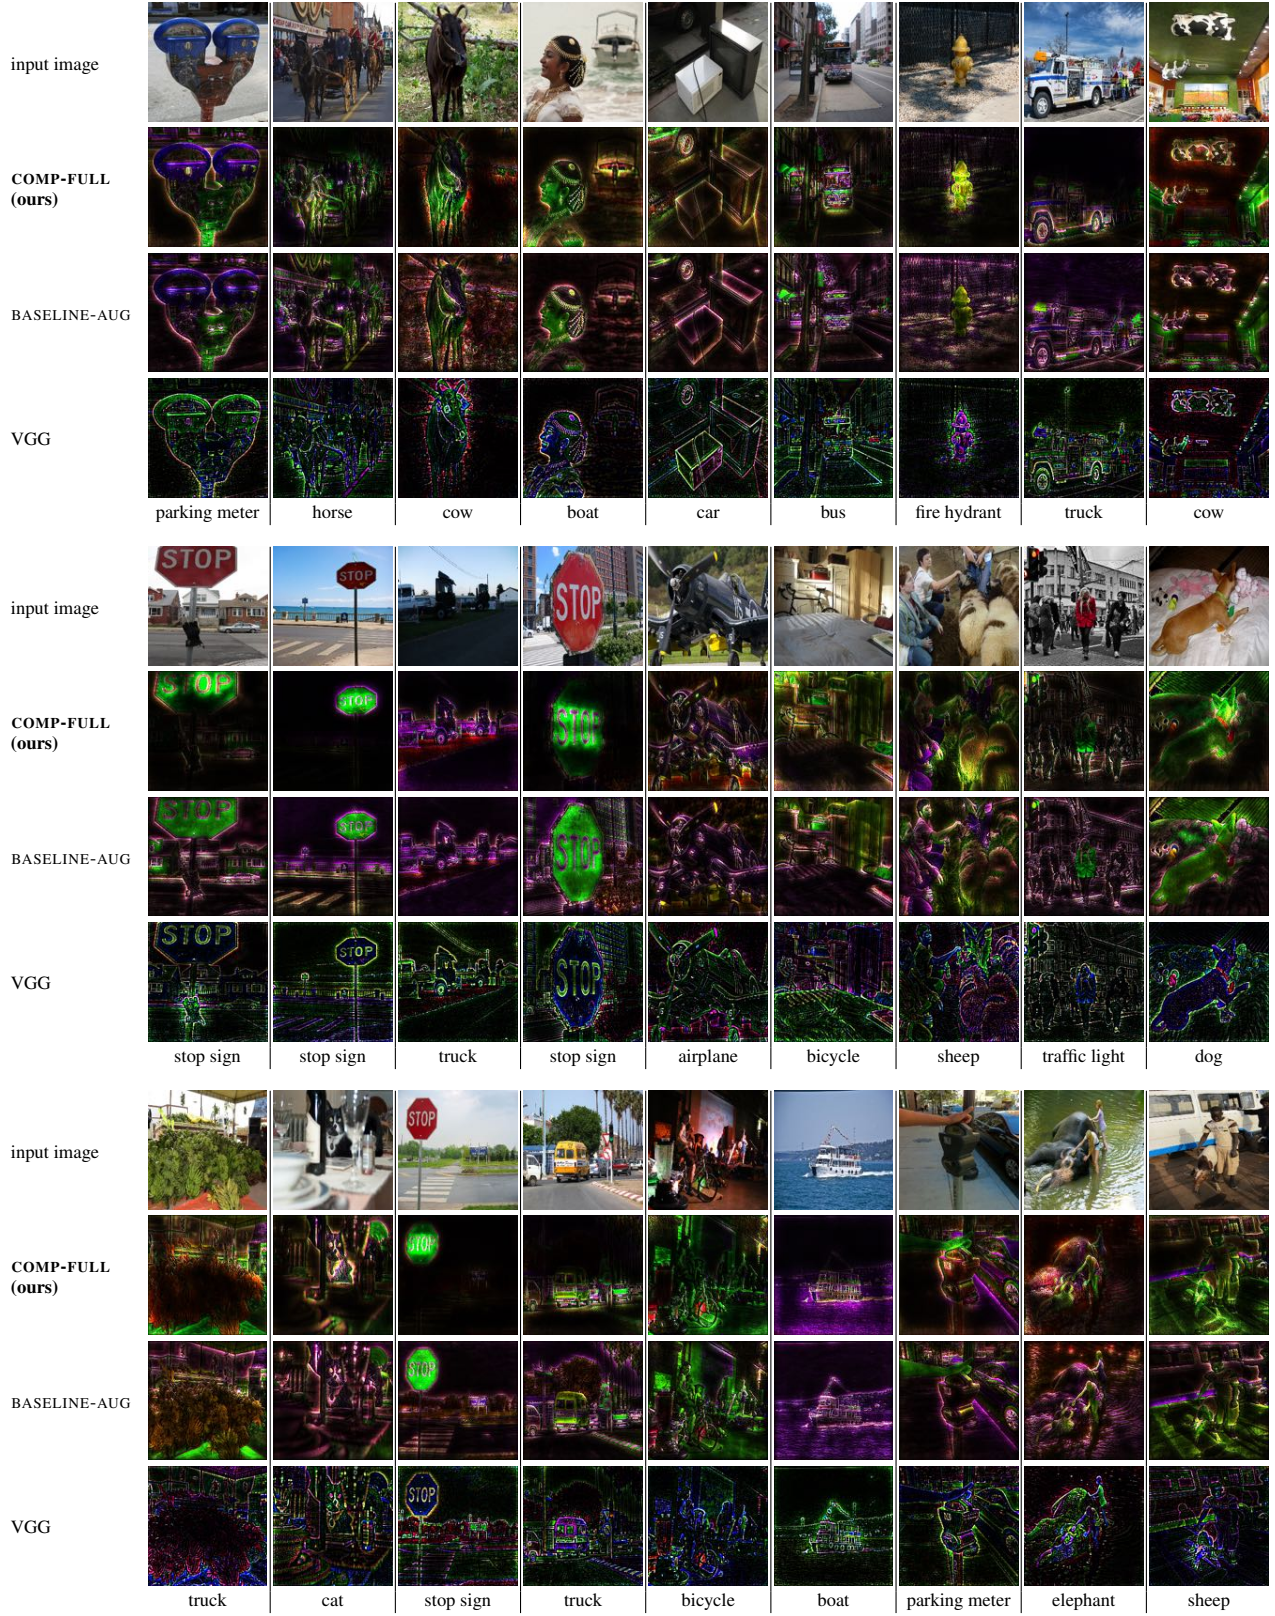

Figure 2: Same as Figure 6 in the main paper.



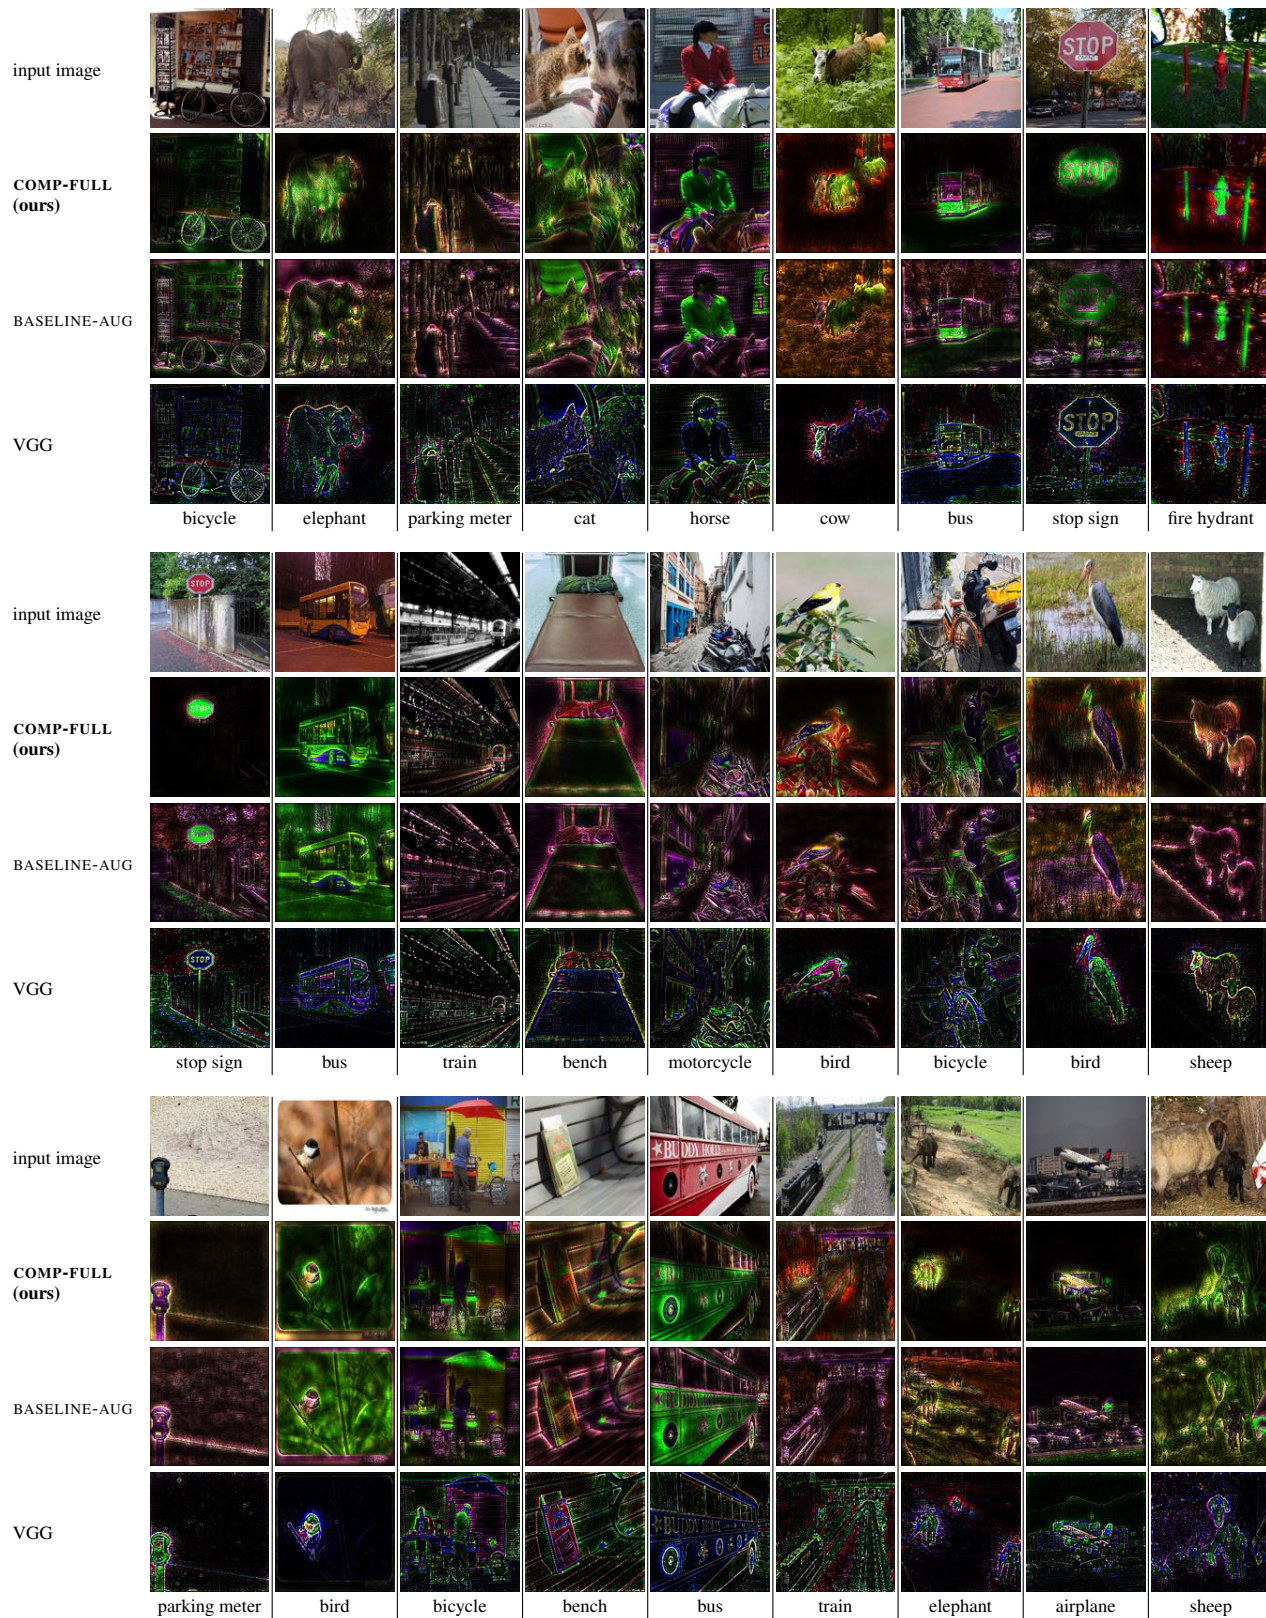

Figure 3: Same as Figure 6 in the main paper.



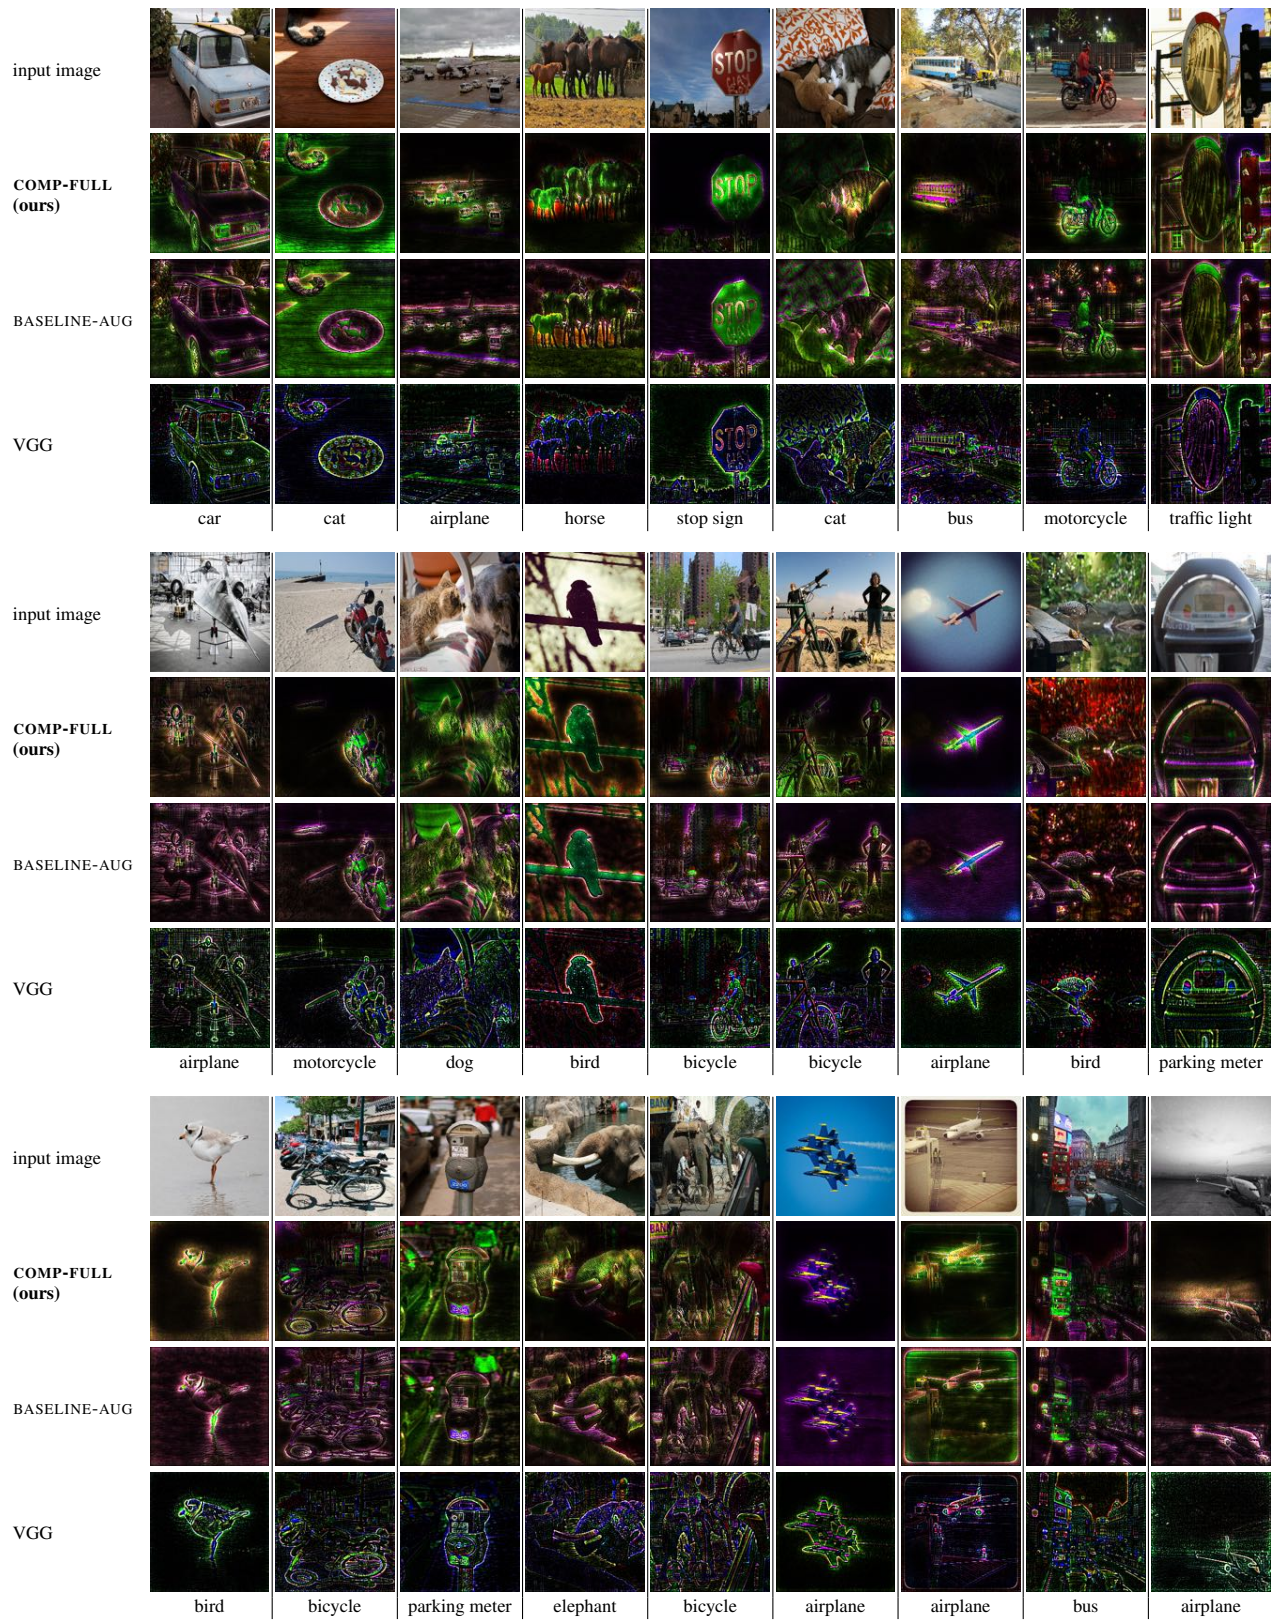

Figure 4: Same as Figure 6 in the main paper.



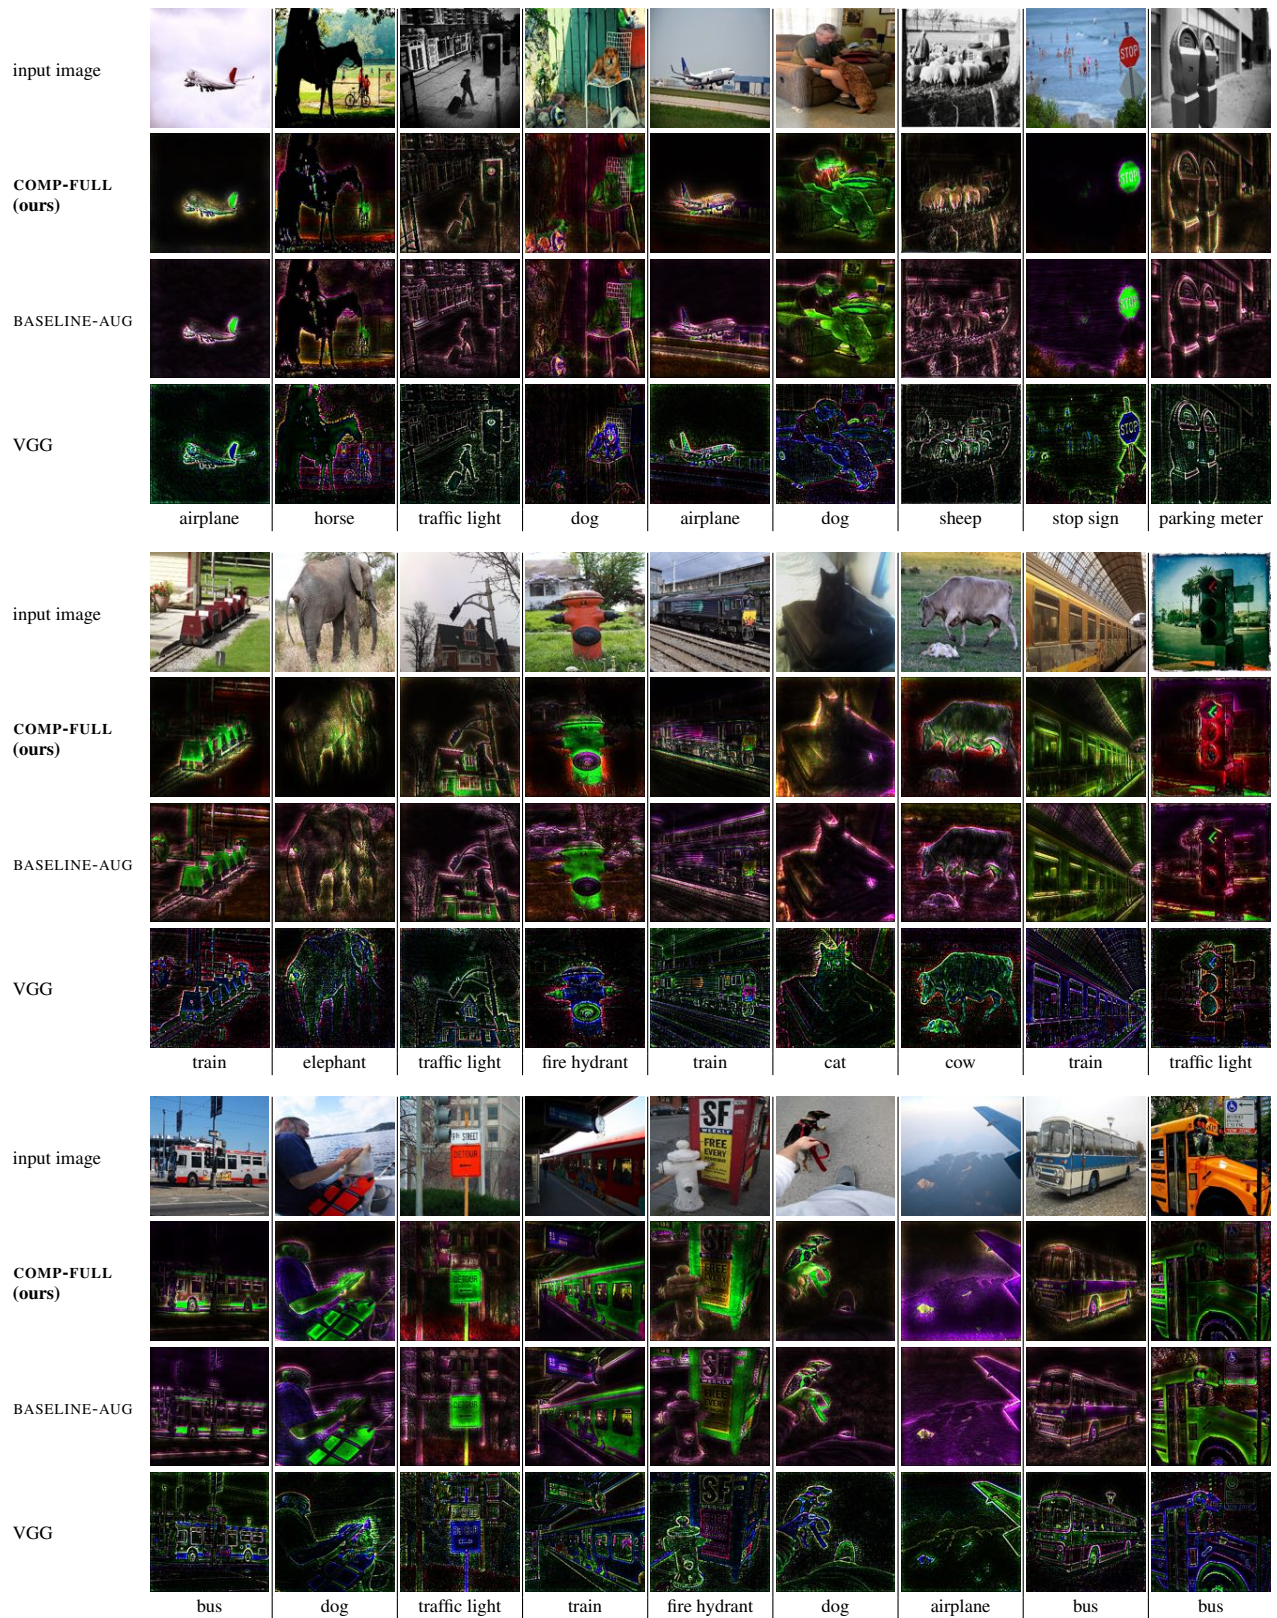

Figure 5: Same as Figure 6 in the main paper.



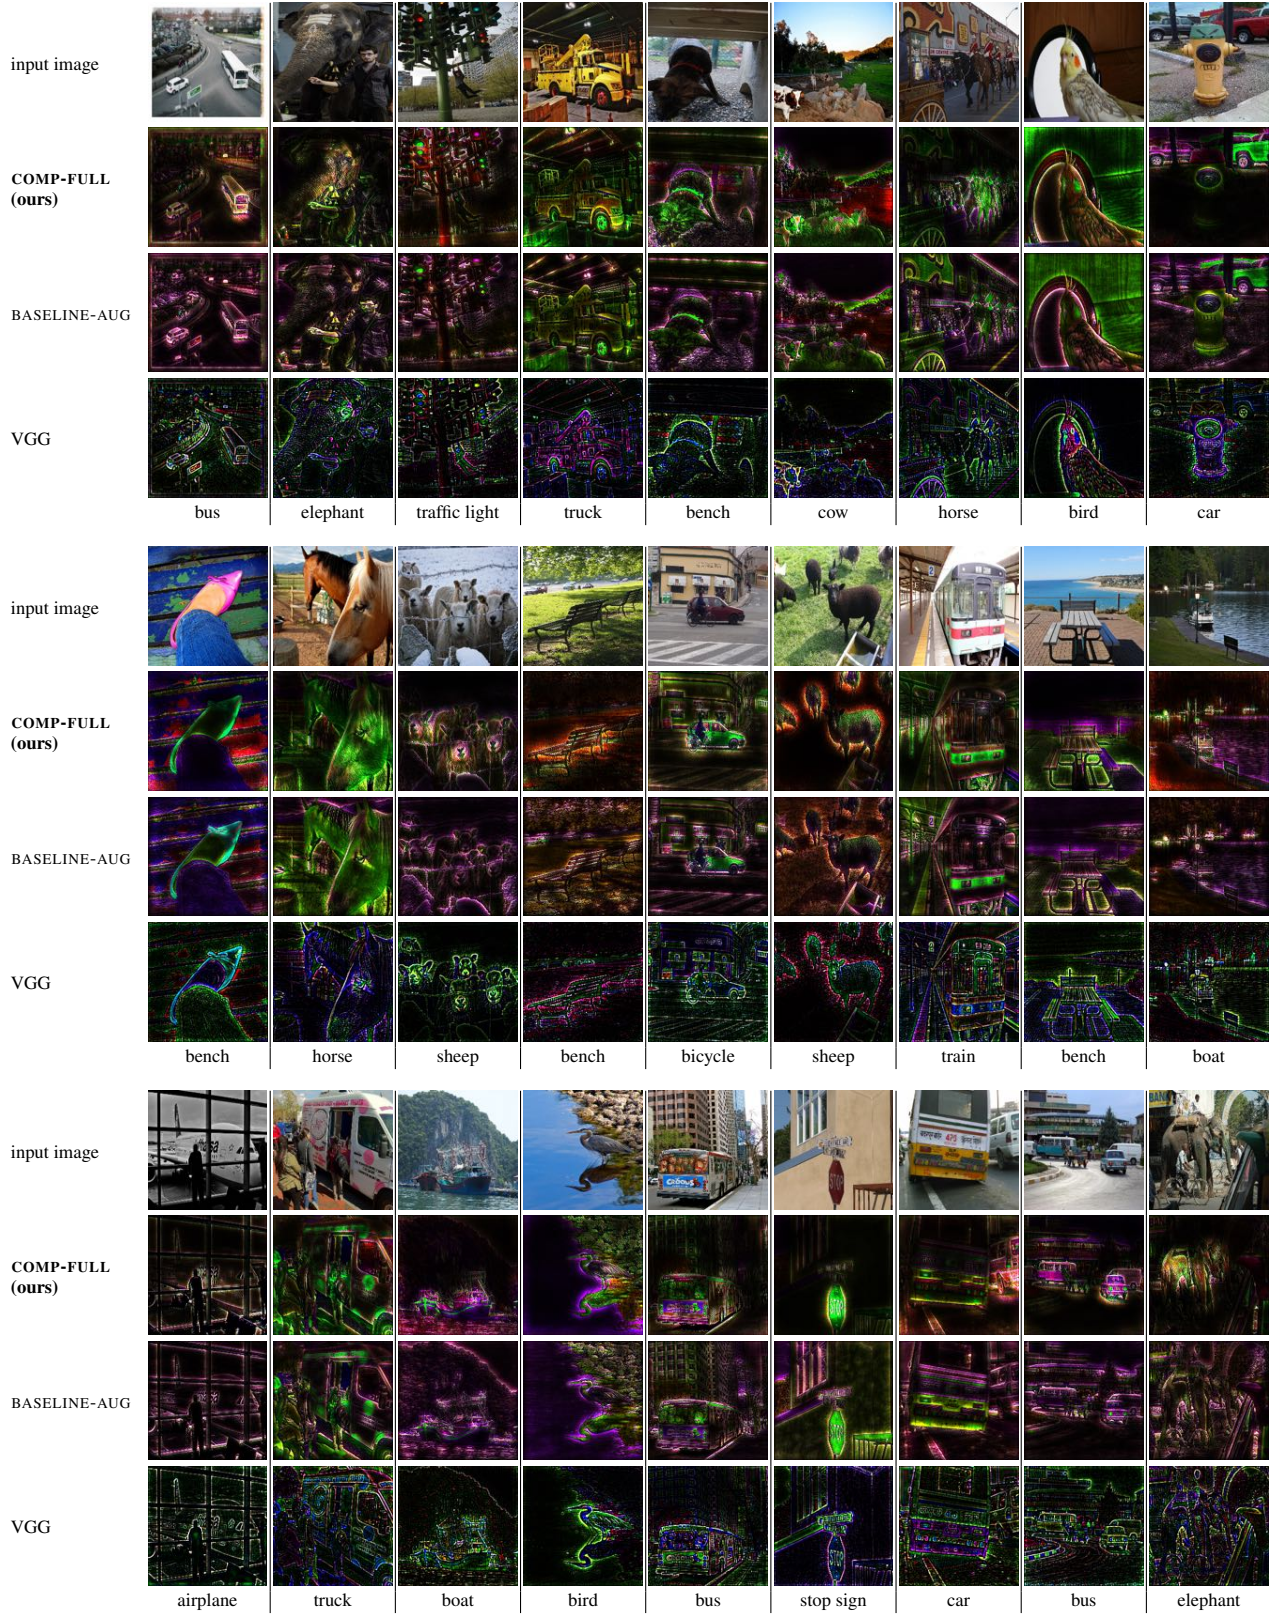

Figure 6: Same as Figure 6 in the main paper.



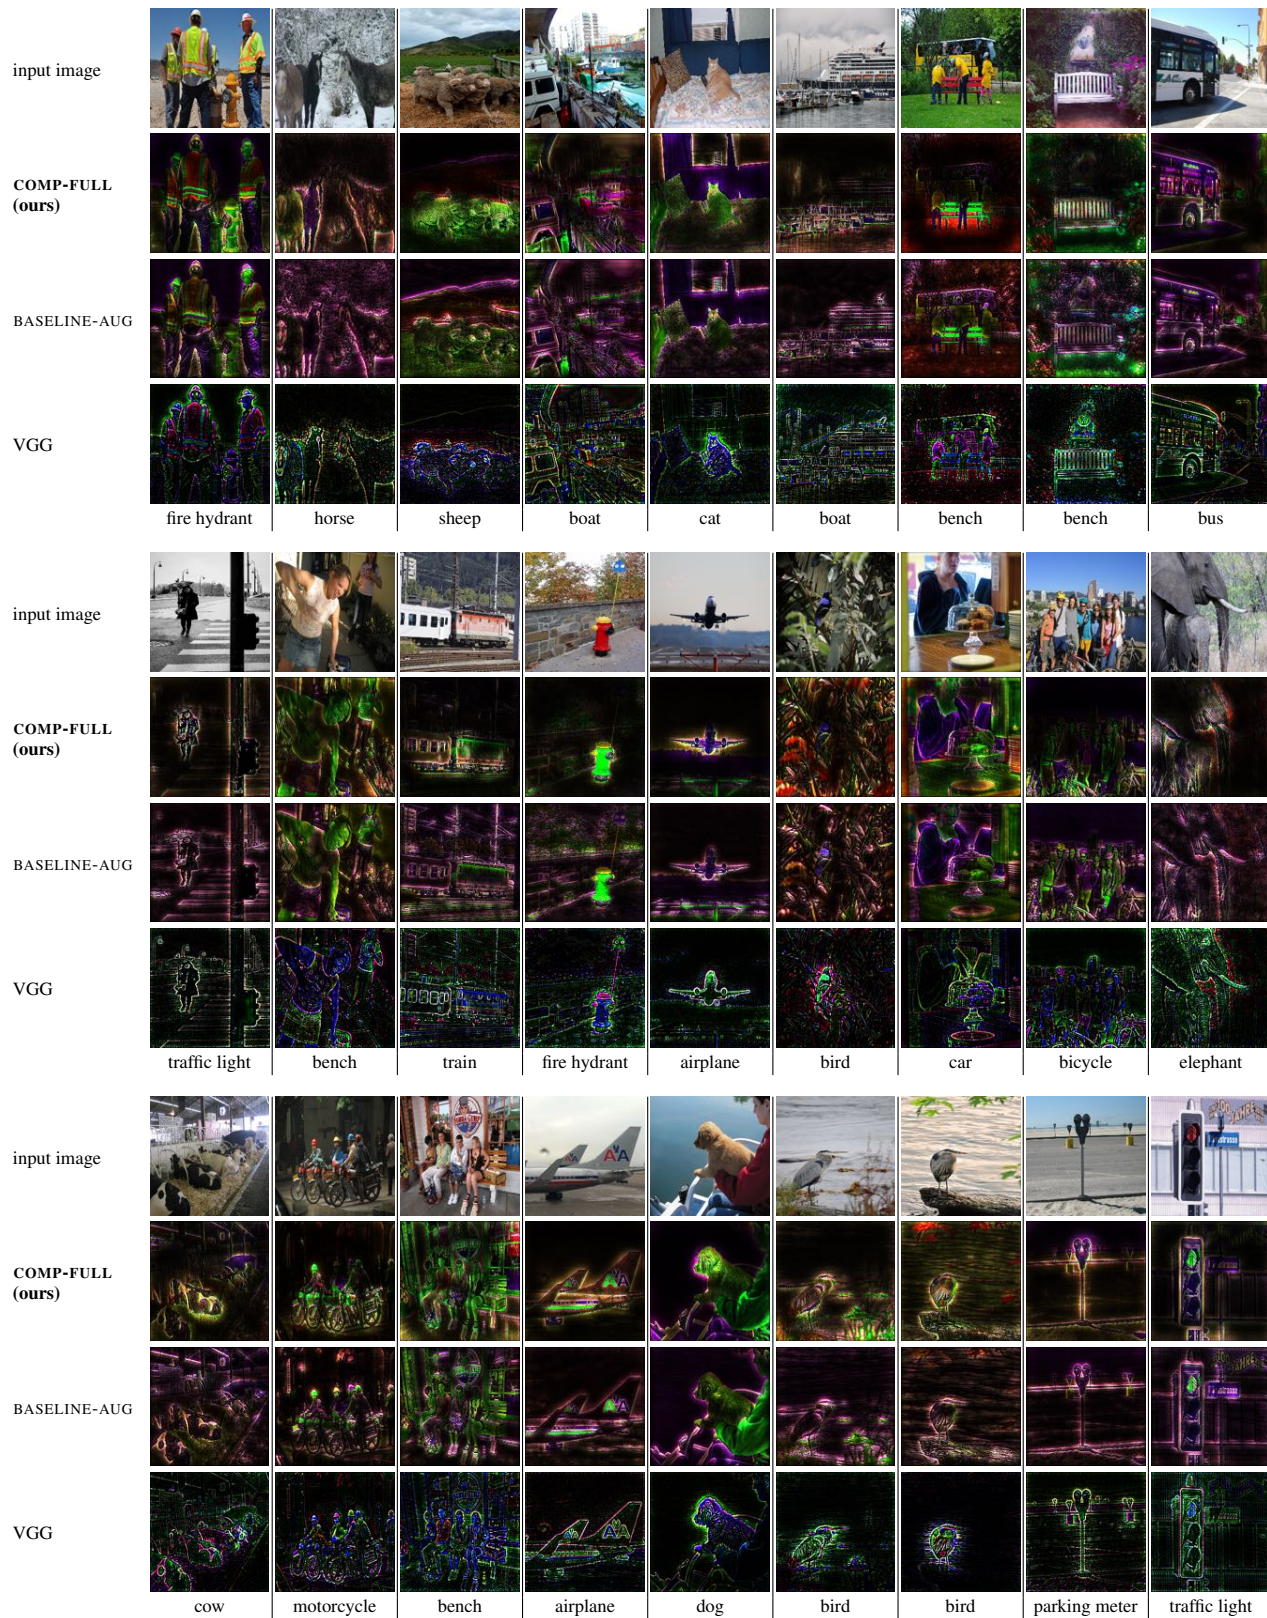

Figure 7: Same as Figure 6 in the main paper.



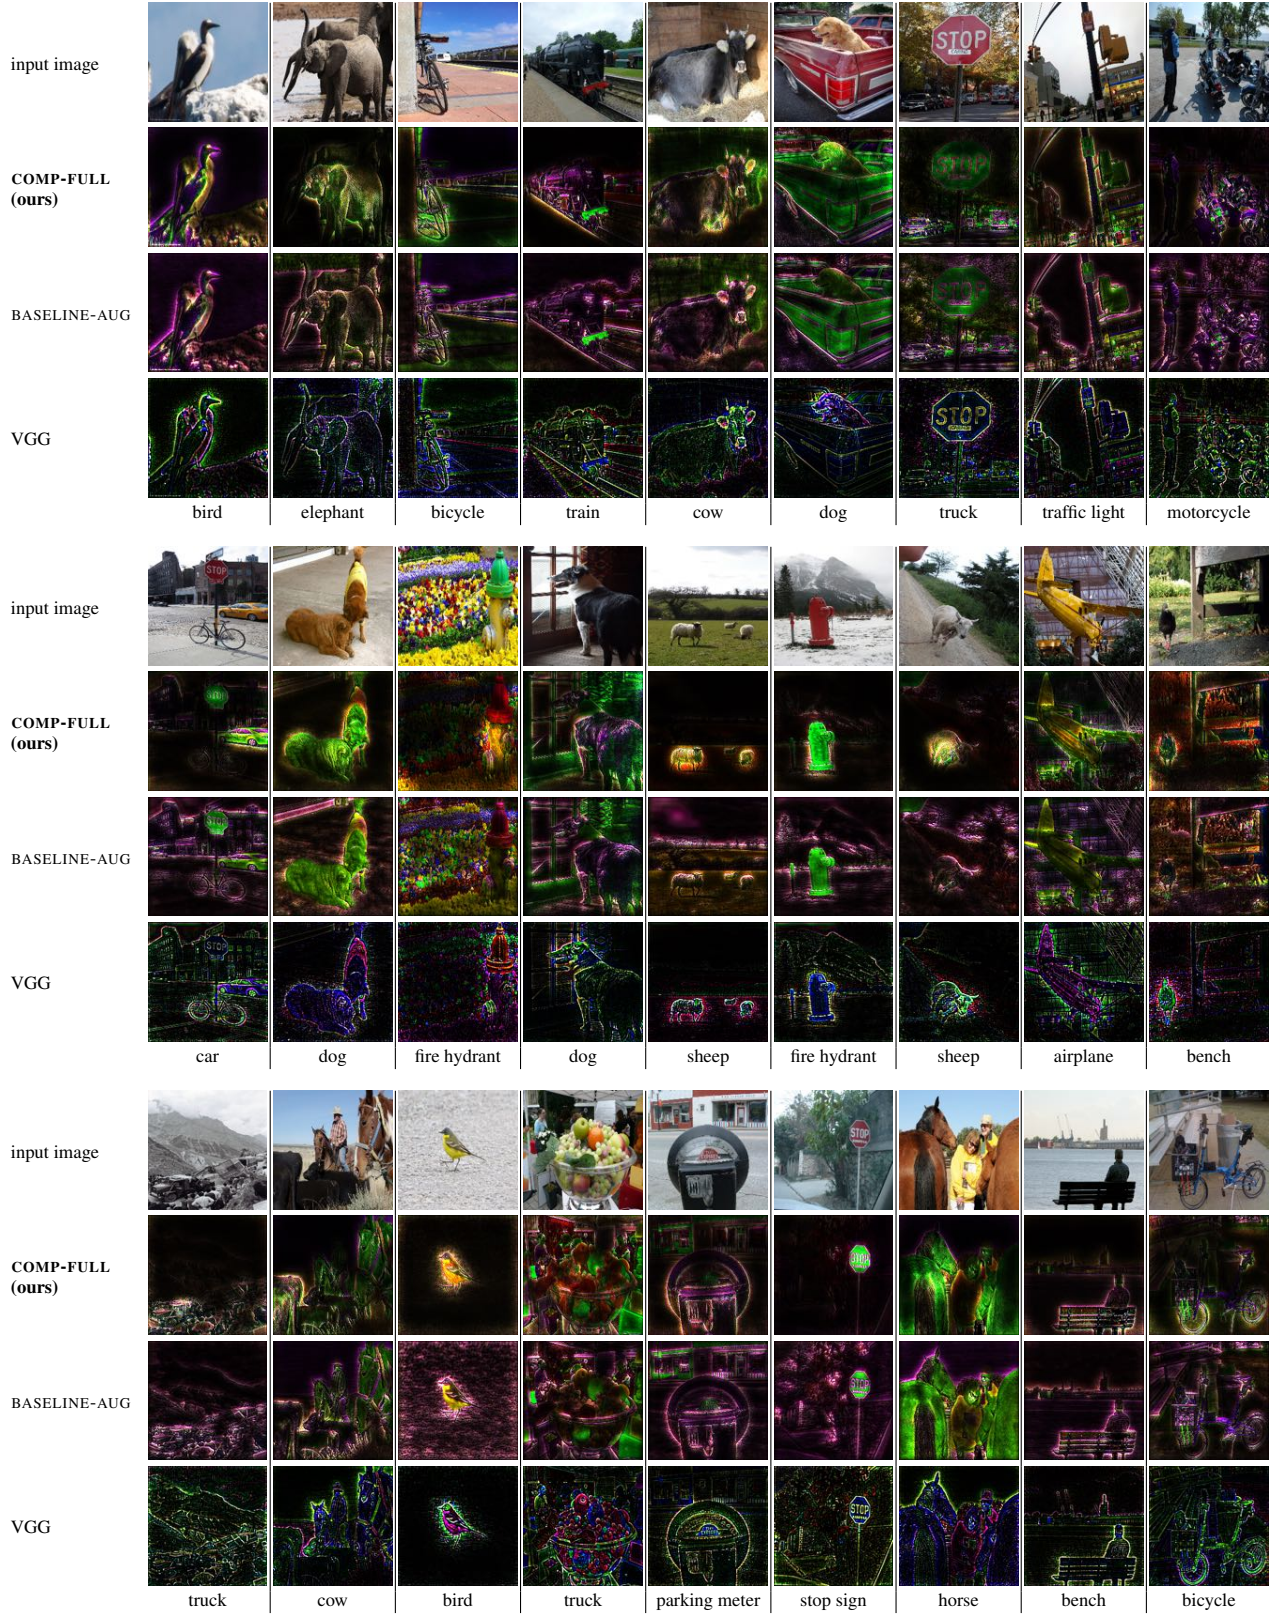

Figure 8: Same as Figure 6 in the main paper.



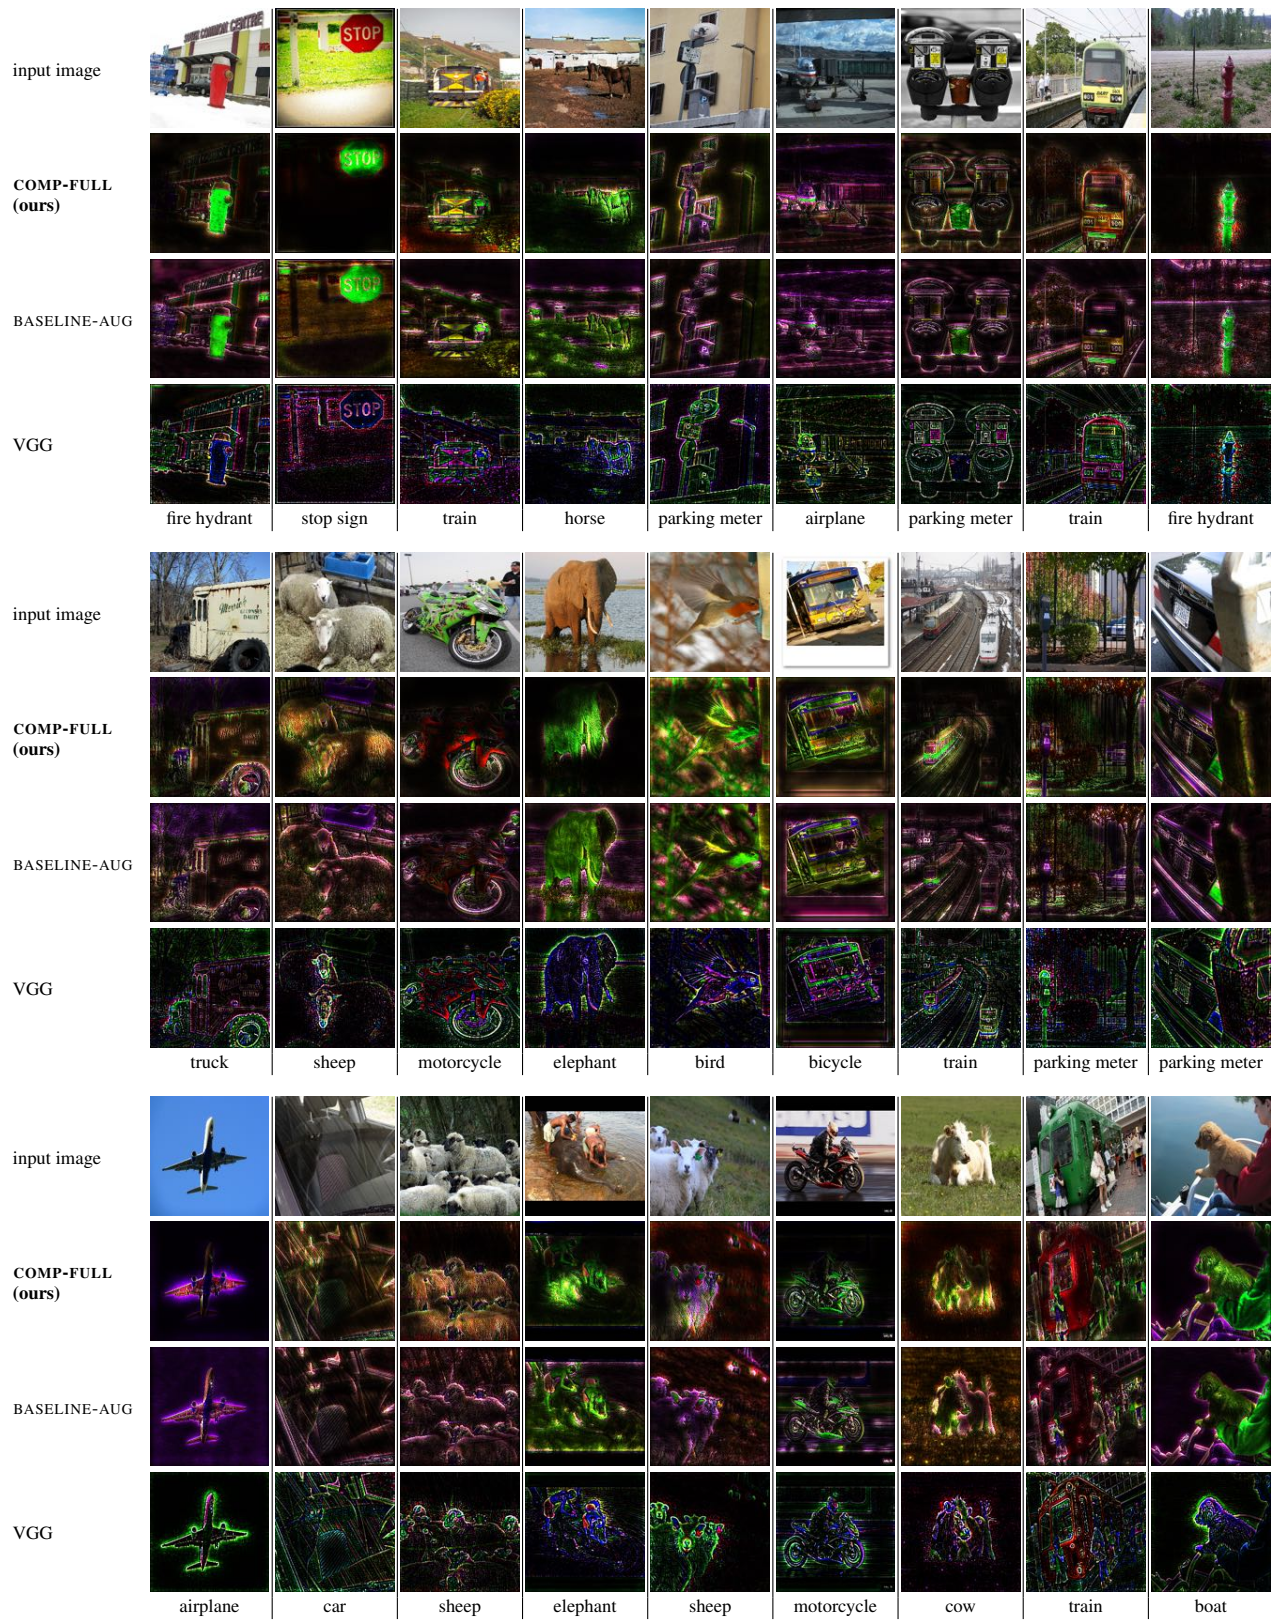

Figure 9: Same as Figure 6 in the main paper.
